# Supplementary material for: Societal views on using risk-based innovations to inform cancer screening and referral policies: findings from three community juries
Source: Springer Nature journal article supplement (doi:10.1186/s12889-025-21996-x), 2025-02-27
Supplement: MOESM1 [file 12889_2025_21996_MOESM1_ESM.pdf]

# Societal views on using risk-based innovations to inform cancer screening and referral policies: Findings from three community juries

Dennison RA, Clune RJ, Waller J, Tung J, John SD, Moorthie SA, Usher-Smith JA

## Additional file 1

**Supplementary Table 1. Summary of the risk-based innovations used as examples in this study.**

|                                                          | How can it be used to assess cancer risk?                                                                                                                                                                                                        | How does someone take part?                                                                                              |
|----------------------------------------------------------|--------------------------------------------------------------------------------------------------------------------------------------------------------------------------------------------------------------------------------------------------|--------------------------------------------------------------------------------------------------------------------------|
| Polygenic risk scores                                    | A polygenic risk score accounts for the many variations in someone's genes. Some of these increase the risk of certain cancers while others protect against them.                                                                                | By providing a blood or saliva sample for analysis.                                                                      |
| Geodemographic segmentation                              | By considering geodemographic data, generalisations about cancer risk can be made (e.g. population density or pollution levels).                                                                                                                 | By providing their postcode and additional data such as about their housing or socioeconomic situation.                  |
| Minimally invasive tests                                 | Biomarkers can be used to understand processes occurring in the body. They may be produced by the cancer cells themselves, or other cells in response to the cancer. A minimally invasive test would provide a snapshot of someone's biomarkers. | By providing a blood, saliva, urine, stool or sweat sample for analysis using a non-invasive or minimally invasive test. |
| Continuous monitoring of biomarkers                      | Unlike the snapshot generated by a minimally invasive test, continuous monitoring would reveal changes in someone's biomarkers over a period of time.                                                                                            | By wearing a patch or other sensor to constantly measure certain biomarkers.                                             |
| Artificial intelligence (AI) analysis of medical records | An AI algorithm could be applied to someone's medical record (e.g. age, sex, smoking status, past medical history, medications, etc.) and generate a cancer risk score.                                                                          | By consenting to their health records being analysed.                                                                    |
| Wearable devices                                         | A wearable device could continuously track, record, and monitor physical health parameters. For example, sleep patterns or temperature of the skin of the breast.                                                                                | By wearing the device and sharing the data with clinicians.                                                              |

Supplementary Table 2. Additional participant characteristics.

|                                                                                                                         | Jury 1<br>Online | Jury 2<br>In-person | Jury 3<br>Online | Total (%)  |
|-------------------------------------------------------------------------------------------------------------------------|------------------|---------------------|------------------|------------|
| Total N                                                                                                                 | 8                | 9                   | 7                | 24 (100.0) |
| <b><i>Familiarity with cancer and screening</i></b>                                                                     |                  |                     |                  |            |
| Family history of cancer                                                                                                |                  |                     |                  |            |
| Yes                                                                                                                     | 3                | 4                   | 3                | 10 (41.7)  |
| No, don't know or prefer not to say                                                                                     | 5                | 5                   | 4                | 14 (58.3)  |
| History of cancer in a close friend                                                                                     |                  |                     |                  |            |
| Yes                                                                                                                     | 1                | 4                   | 6                | 11 (45.8)  |
| No, don't know or prefer not to say                                                                                     | 7                | 5                   | 1                | 13 (54.2)  |
| Have completed screening for:                                                                                           |                  |                     |                  |            |
| Abdominal aortic aneurysm                                                                                               | 1                | 2                   | 1                | 4 (16.7)   |
| Bowel cancer                                                                                                            | 2                | 2                   | 3                | 7 (29.2)   |
| Breast cancer                                                                                                           | 1                | 0                   | 1                | 2 (8.3)    |
| Cervical cancer                                                                                                         | 4                | 3                   | 2                | 9 (37.5)   |
| <b><i>Thoughts and beliefs about cancer</i></b>                                                                         |                  |                     |                  |            |
| "These days, many people with cancer can expect to continue with normal activities and responsibilities"                |                  |                     |                  |            |
| Strongly agree or agree                                                                                                 | 5                | 5                   | 4                | 14 (58.3)  |
| Neither disagree nor agree                                                                                              | 2                | 3                   | 1                | 6 (25.0)   |
| Strongly disagree or disagree                                                                                           | 1                | 1                   | 2                | 4 (16.7)   |
| "Most cancer treatment is worse than the cancer itself"                                                                 |                  |                     |                  |            |
| Strongly agree or agree                                                                                                 | 2                | 6                   | 4                | 12 (50.0)  |
| Neither disagree nor agree                                                                                              | 4                | 2                   | 1                | 7 (29.2)   |
| Strongly disagree or disagree                                                                                           | 2                | 1                   | 2                | 5 (20.8)   |
| "I would not want to know if I had cancer"                                                                              |                  |                     |                  |            |
| Strongly agree or agree                                                                                                 | 1                | 0                   | 0                | 1 (4.2)    |
| Neither disagree nor agree                                                                                              | 1                | 1                   | 0                | 2 (8.3)    |
| Strongly disagree or disagree                                                                                           | 6                | 8                   | 7                | 21 (87.5)  |
| "Cancer can often be cured"                                                                                             |                  |                     |                  |            |
| Strongly agree or agree                                                                                                 | 5                | 7                   | 4                | 16 (66.7)  |
| Neither disagree nor agree                                                                                              | 1                | 1                   | 0                | 2 (8.3)    |
| Strongly disagree or disagree                                                                                           | 2                | 1                   | 3                | 6 (25.0)   |
| "Going to the doctor as quickly as possible after noticing a symptom of cancer could increase the chances of surviving" |                  |                     |                  |            |
| Strongly agree or agree                                                                                                 | 8                | 8                   | 7                | 23 (95.8)  |
| Neither disagree nor agree                                                                                              | 0                | 1                   | 0                | 1 (4.2)    |
| Strongly disagree or disagree                                                                                           | 0                | 0                   | 0                | 0 (0.0)    |
| "A diagnosis of cancer is a death sentence"                                                                             |                  |                     |                  |            |
| Strongly agree or agree                                                                                                 | 3                | 2                   | 2                | 7 (29.2)   |
| Neither disagree nor agree                                                                                              | 2                | 5                   | 0                | 7 (29.2)   |
| Strongly disagree or disagree                                                                                           | 3                | 2                   | 5                | 10 (41.7)  |

Compared with other people the same age and sex as you, what do you think your chances of getting cancer in the next 10 years are?

|                             |   |   |   |           |
|-----------------------------|---|---|---|-----------|
| Below or much below average | 1 | 0 | 2 | 3 (12.5)  |
| Same as always              | 3 | 9 | 2 | 14 (58.3) |
| Above or much above average | 4 | 0 | 3 | 7 (29.2)  |

---

***Thoughts and beliefs about screening***

“If I feel well, it is not necessary to have cancer screening”

|                               |   |   |   |           |
|-------------------------------|---|---|---|-----------|
| Strongly agree or agree       | 1 | 0 | 1 | 2 (8.3)   |
| Neither disagree nor agree    | 1 | 1 | 0 | 2 (8.3)   |
| Strongly disagree or disagree | 6 | 8 | 6 | 20 (83.3) |

“If I follow a healthy lifestyle such as a balanced diet and regular exercise, I don’t feel it is necessary to have regular screening”

|                               |   |   |   |           |
|-------------------------------|---|---|---|-----------|
| Strongly agree or agree       | 2 | 0 | 1 | 3 (12.5)  |
| Neither disagree nor agree    | 0 | 1 | 0 | 1 (4.2)   |
| Strongly disagree or disagree | 6 | 8 | 6 | 20 (83.3) |

“I see a doctor or have cancer screening only when I have a health problem”

|                               |   |   |   |          |
|-------------------------------|---|---|---|----------|
| Strongly agree or agree       | 3 | 3 | 3 | 9 (37.5) |
| Neither disagree nor agree    | 1 | 4 | 2 | 7 (29.2) |
| Strongly disagree or disagree | 4 | 2 | 2 | 8 (33.3) |

---

***Attitudes towards online privacy***

In general, how concerned are you about your privacy while you are using the internet?

|                        |   |   |   |           |
|------------------------|---|---|---|-----------|
| Extremely or very      | 2 | 2 | 0 | 4 (16.7)  |
| Moderately             | 3 | 4 | 4 | 11 (45.8) |
| Slightly or not at all | 3 | 3 | 3 | 9 (37.5)  |

Are you concerned that you are asked for too much personal information when you register or make purchases online?

|                        |   |   |   |          |
|------------------------|---|---|---|----------|
| Extremely or very      | 2 | 2 | 2 | 6 (25.0) |
| Moderately             | 3 | 5 | 1 | 9 (37.5) |
| Slightly or not at all | 3 | 2 | 4 | 9 (37.5) |

Are you concerned who might access your medical records electronically?

|                        |   |   |   |           |
|------------------------|---|---|---|-----------|
| Extremely or very      | 1 | 2 | 2 | 5 (20.8)  |
| Moderately             | 1 | 1 | 2 | 4 (16.7)  |
| Slightly or not at all | 6 | 6 | 3 | 15 (62.5) |

Do you watch for ways to control what people send you online?

|                     |   |   |   |           |
|---------------------|---|---|---|-----------|
| Rarely or sometimes | 3 | 5 | 3 | 11 (45.8) |
| Often               | 3 | 4 | 3 | 10 (41.7) |
| Always              | 2 | 0 | 1 | 3 (12.5)  |

---

**Supplementary Figure 1. Participants evaluation of the community juries.**

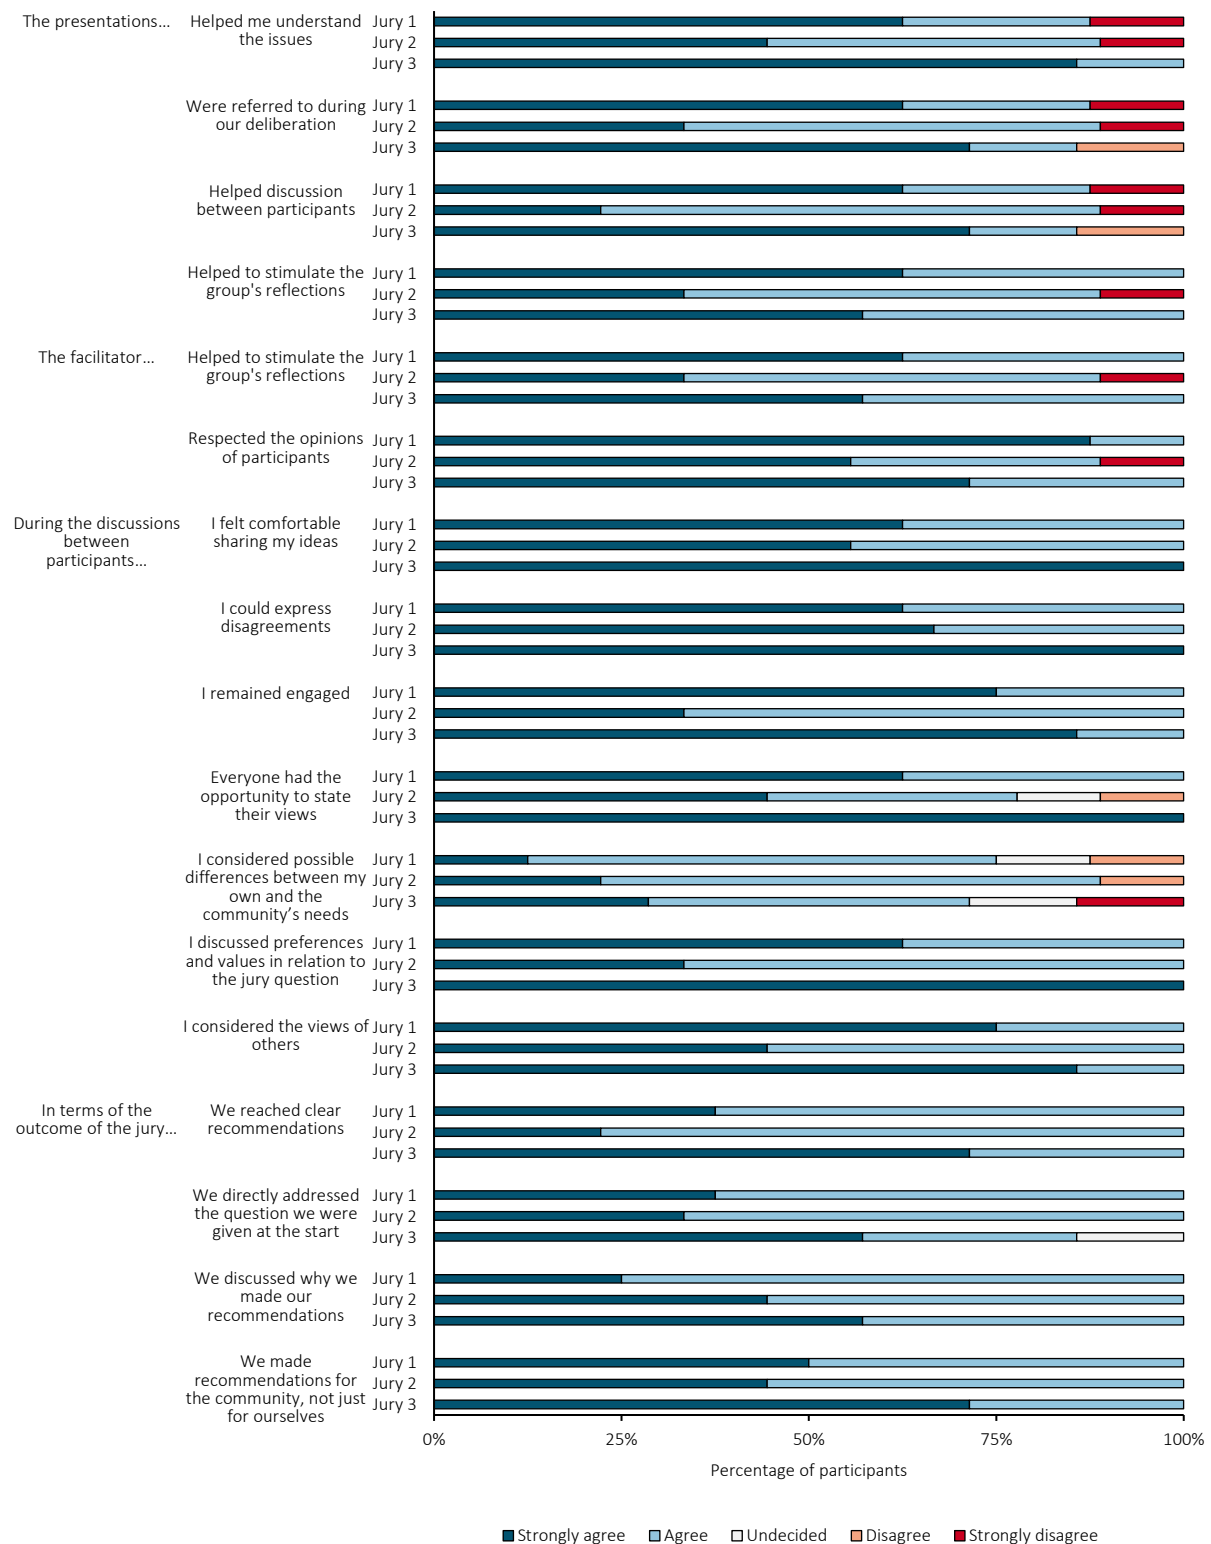

*Jury 1 (online) n=8; jury 2 (in-person) n=9; jury 3 (online) n=7 participants.*
